# Supplementary material for: Continuous crossbreeding of sake yeasts using growth selection systems for a-type and α-type cells
Source: PubMed Central journal article supplement (PMC4938812; doi:10.1186/s13568-016-0216-x), 2016-07-08
Supplement: 13568_2016_216_MOESM1_ESM.pdf [file 13568_2016_216_MOESM1_ESM.pdf]

# Supplementary Materials

*AMB Express*

## **Continuous crossbreeding of sake yeasts using growth selection systems for a-type and $\alpha$ -type cells**

Nobuo Fukuda<sup>1\*</sup>, Misato Kaishima<sup>2</sup>, Jun Ishii<sup>3</sup>, Akihiko Kondo<sup>2</sup> and Shinya Honda<sup>1</sup>

<sup>1</sup>Biomedical Research Institute, National Institute of Advanced Industrial Science and Technology (AIST), Higashi, Tsukuba, Ibaraki 305-8566, Japan

<sup>2</sup>Department of Chemical Science and Engineering, Graduate School of Engineering, Kobe University, 1-1 Rokkodai, Nada, Kobe, Japan.

<sup>3</sup>Organization of Advanced Science and Technology, Kobe University, 1-1 Rokkodai, Nada, Kobe, Japan.

\*Corresponding author

Fax: +81 29 861 6194

Tel: +81 29 849 1458

E-mail: nob-fukuda@aist.go.jp

## Doc. S1

### Supporting Information for Materials and Methods

**PCR assay to confirm removal of unnecessary plasmids.** The oligonucleotides used for this assay are listed in Table S3. The plasmids pLhyS-2K-Pa1 and pHhyS-3K-2 $\alpha$  contain *kanMX4* and *hygro* selection markers as exogenous genes. To confirm removal of these plasmids, the *hygro* gene was amplified from the genomic DNA derived from each yeast strain with the oligonucleotide pair o1 and o2, and the *kanMX4* gene was amplified with the oligonucleotide pairs o3 and o4 (for pLhyS-2K-Pa1) or o5 and o4 (for pHhyS-3K-2 $\alpha$ ). The amplified DNA fragments were visualized by agarose gel electrophoresis.

**Microscopic observation.** Each yeast strain was cultured overnight in 500  $\mu$ L YPD medium at 30°C. The cells then were harvested, washed with 500  $\mu$ L distilled water, and resuspended in 100  $\mu$ L phosphate buffered saline (PBS) containing 4  $\mu$ M Hoechst 33342 (Dojindo Laboratories Co., Ltd, Kumamoto, Japan) to stain nuclear DNA within yeast cells. After 1 h of incubation at room temperature, each cell suspension was diluted 20 fold using PBS. Stained cells were observed using a fluorescent microscope (BZ-X700, Keyence Co., Ltd, Tokyo, Japan). Each image was photographed with the same exposure time using a 60x objective lens. Fluorescent images were overlaid on the corresponding bright-field images.

**Table S1.** Hygromycin B (HYG)-resistance of parental yeasts grown in YPD medium. The OD<sub>600</sub> values of the YPD cultures are presented.

| Strain 0 | Concentration of HYG [ $\mu\text{g/ml}$ ] |      |      |      |      |
|----------|-------------------------------------------|------|------|------|------|
|          | 100                                       | 200  | 300  | 500  |      |
| K6       | 6.55                                      | 5.46 | 4.00 | 0.09 | 0.02 |
| K7       | 6.79                                      | 3.18 | 0.10 | 0.08 | 0.10 |
| K9       | 6.88                                      | 2.79 | 0.22 | 0.10 | 0.11 |

**Table S2.** Geneticin (G418)-resistance of parental yeasts grown in YPD medium. The OD<sub>600</sub> values of the YPD cultures are presented.

| Strain 0 | Concentration of G418 [ $\mu\text{g/ml}$ ] |      |      |      |
|----------|--------------------------------------------|------|------|------|
|          | 100                                        | 200  | 300  |      |
| K6       | 7.38                                       | 0.48 | 0.13 | 0.11 |
| K7       | 7.01                                       | 0.24 | 0.11 | 0.11 |
| K9       | 7.09                                       | 0.18 | 0.10 | 0.10 |

**Table S3.** Sequences of oligonucleotides used for PCR assay.

| Number | Sequence                                   |
|--------|--------------------------------------------|
| 1      | 5'-CAAAGcggccgcATGGATAGATCCGGAAAGCC-3'     |
| 2      | 5'-AATTTATTTCggatccCTATTCCTTTGCCCTCGGAC-3' |
| 3      | 5'-GAATCAAAAgcggccgcATGGGTAAGGAAAAGACT-3'  |
| 4      | 5'-CCCCAGTTTGggatccTTAGAAAACTCATCGAGC-3'   |
| 5      | 5'-AAAATTTTCgcggccgcATGGGTAAGGAAAAGACT-3'  |

**Table S4.** Aureobasidin A (AUR)-resistance of K7A and K6AL grown in YPD medium. The OD<sub>600</sub> values of the YPD cultures are presented.

| Strain 0 | Concentration of AUR [ng/ml] |      |      |      |
|----------|------------------------------|------|------|------|
|          | 100                          | 300  | 500  |      |
| K7A      | 1.82                         | 0.14 | 0.08 | 0.04 |
| K6AL     | 2.83                         | 0.32 | 0.08 | 0.09 |

## Supplementary Figures

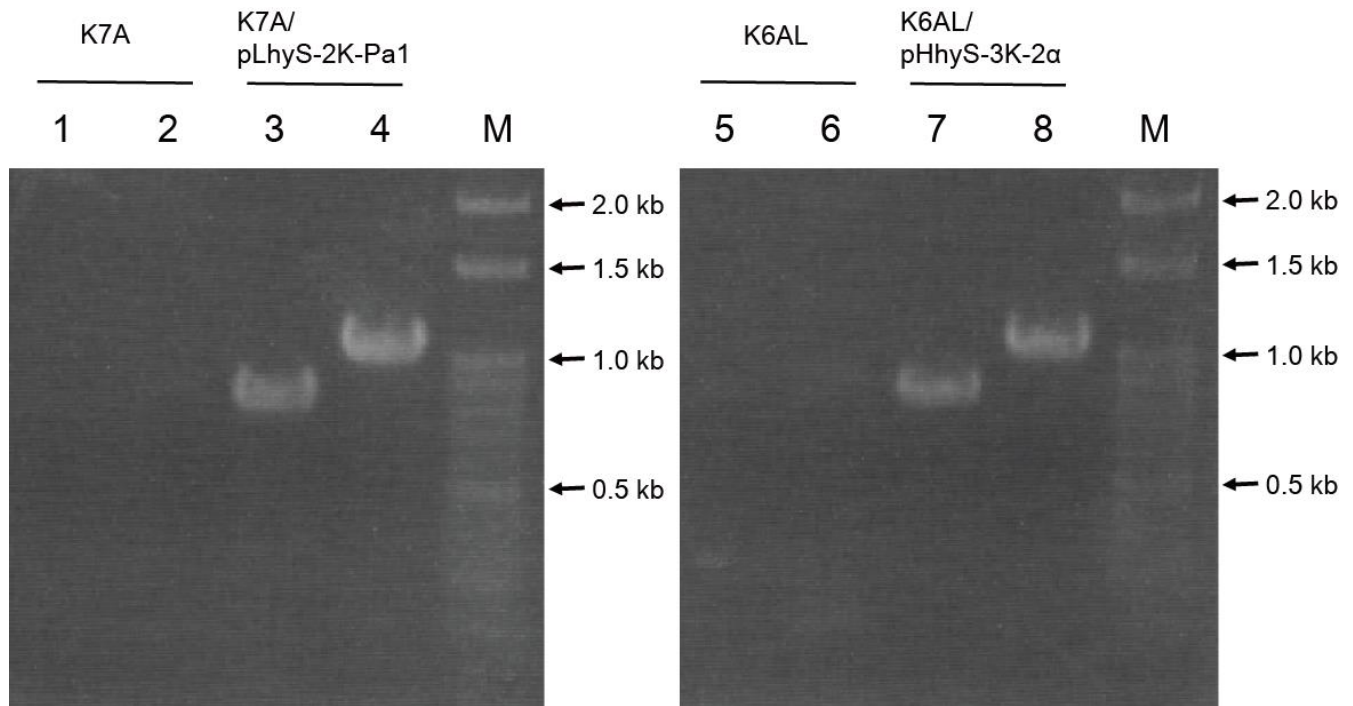

**Figure S1. Confirmation of removal of unnecessary plasmids.** The fragment size of the *kanMX4* gene (ORF) is 810 bp, and that of the *hygro* gene (ORF) is 1,035 bp. The target region for amplification in each lane is as follows: Lanes 1, 3, 5, and 7: *kanMX4*. Lanes 2, 4, 6, and 8: *hygro*. Lane M: DNA size marker.

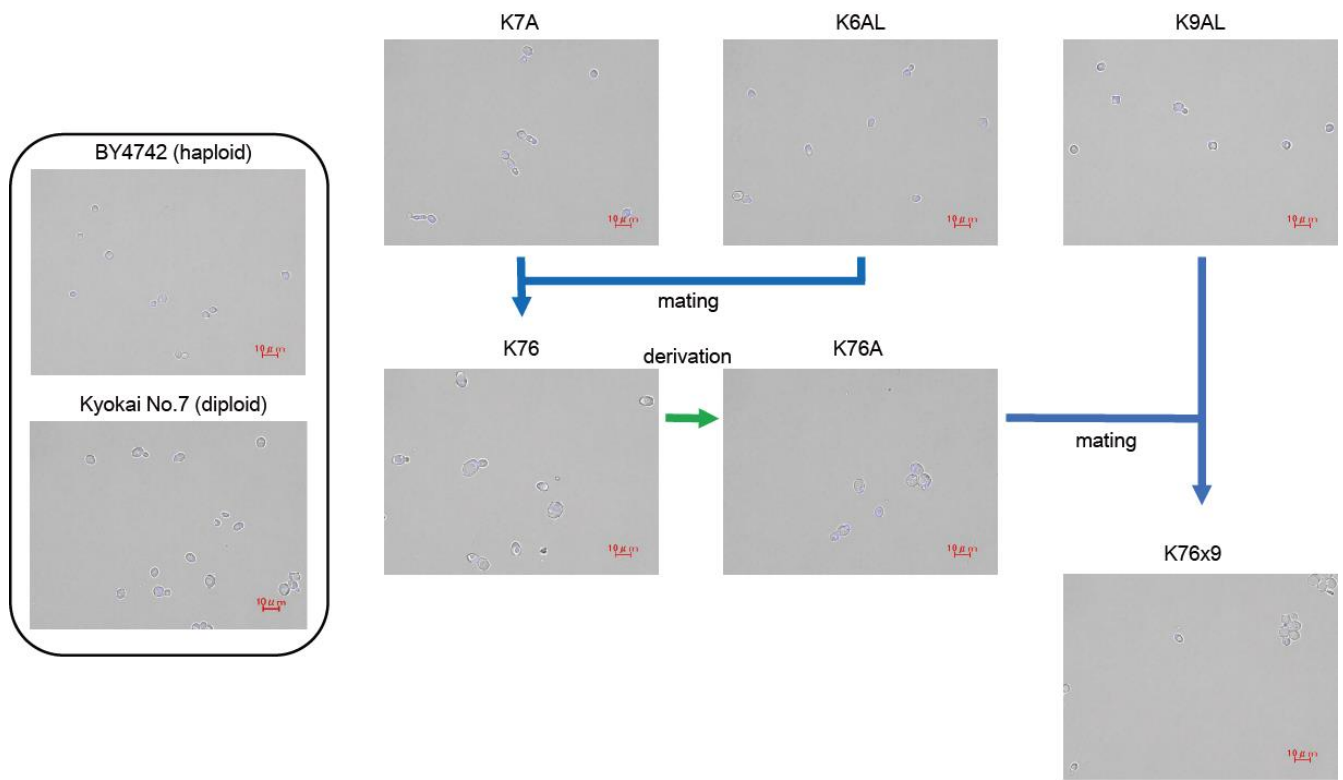

**Figure S2. Observation of cellular size during multi-hybridization.** Nuclear DNA was stained with Hoechst 33342. Scale bar: 10 μm.

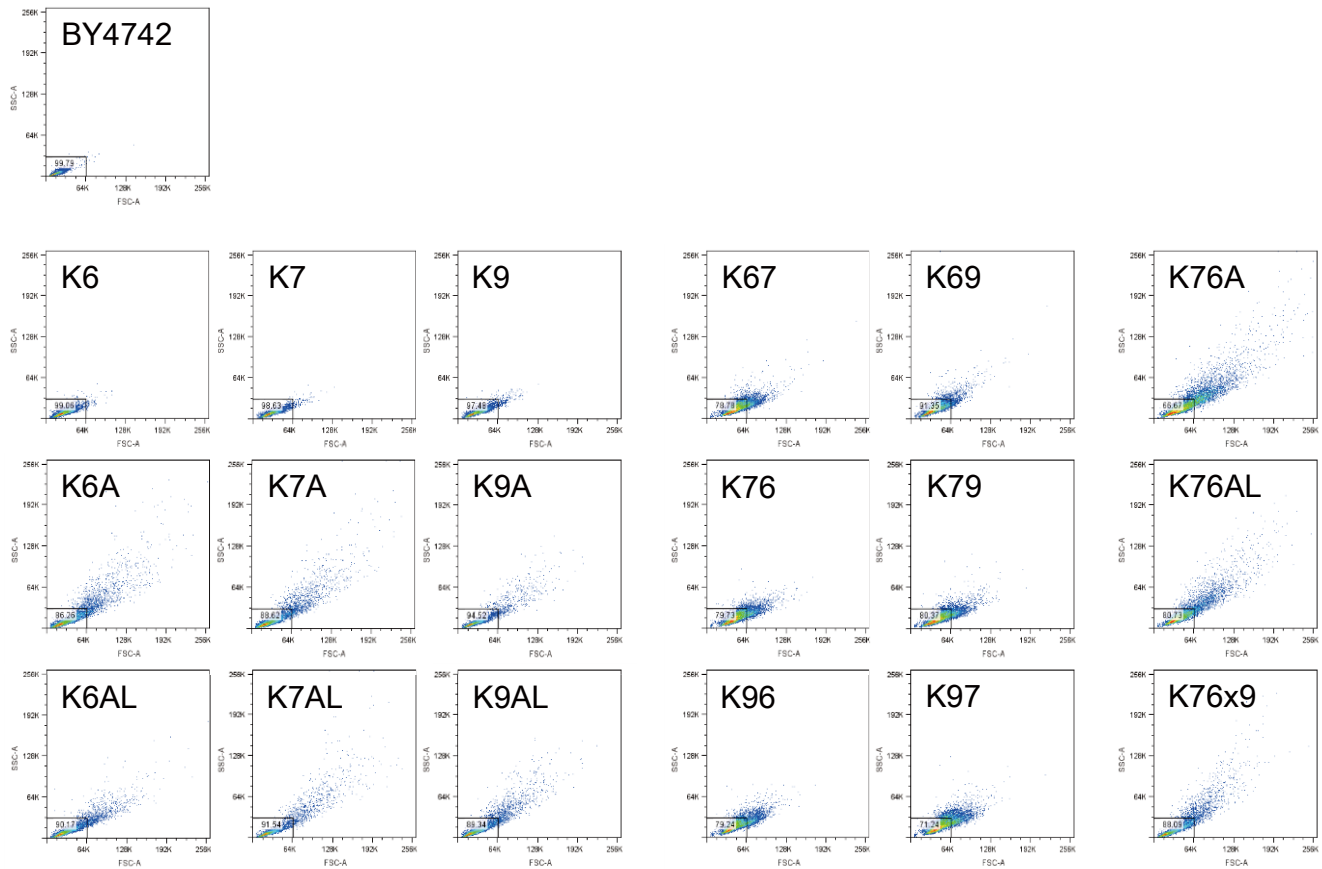

**Figure S3. FSC-SSC dot plots of particles detected by FACS.** A data collection gate was set according to non-flocculated control strains (haploid and diploid) to exclude signals emitted from flocculated cells.

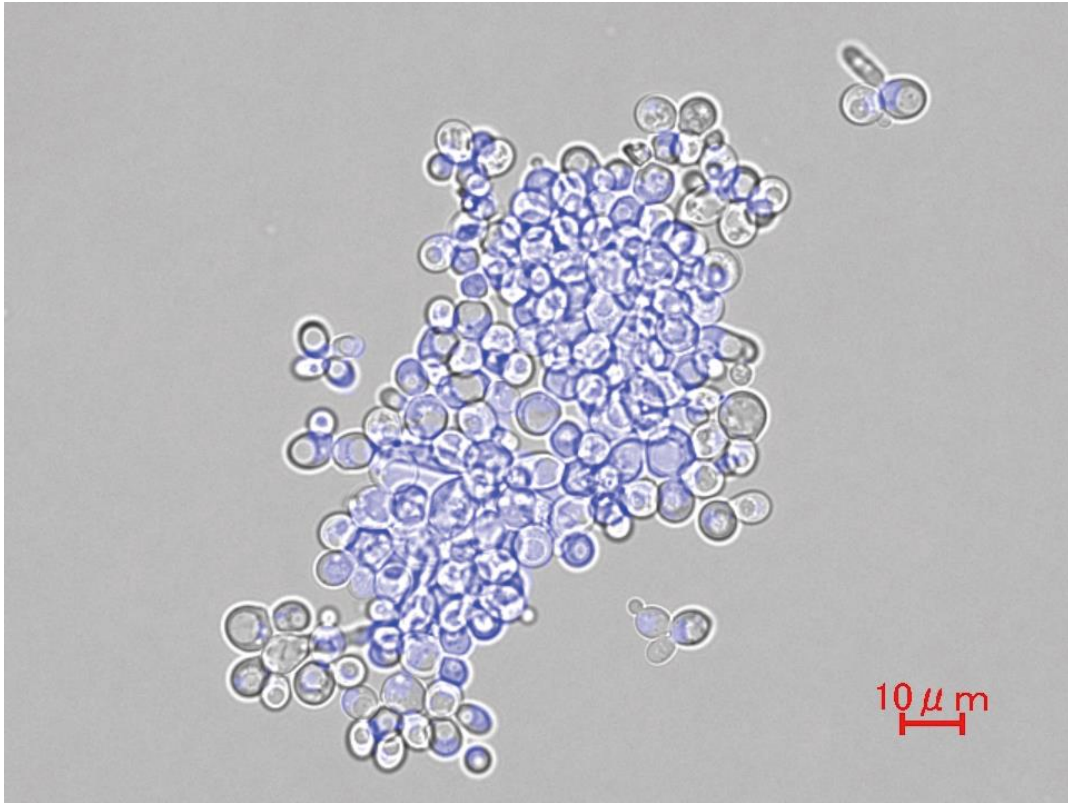

**Figure S4. Cell flocculation of the mating-type-converted strain K7A.** Nuclear DNA was stained with Hoechst 33342. Scale bar: 10  $\mu\text{m}$ .
